# Supplementary material for: Asymmetric allylation of aryl aldehydes: studies on the scope and mechanism of the palladium catalysed diethylzinc mediated umpolung using phosphoramidite ligands
Source: Royal Society of Chemistry journal article supplement (doi:10.1039/b518165h), 2006-01-01
Supplement: b518165h.pdf [file b518165h.pdf]

## **ELECTRONIC SUPPLEMENTARY INFORMATION**

### **Asymmetric Allylation of Aldehydes: Studies on the Scope and Mechanism of the Palladium Catalysed, Diethylzinc Mediated Umpolung using Phosphoramidite Ligands**

Gareth P. Howell, Adriaan J. Minnaard\* and Ben L. Feringa\*

*Department of Organic and Molecular Inorganic Chemistry, Stratingh Institute,  
University of Groningen, Nijenborgh 4, 9747AG Groningen, The Netherlands*

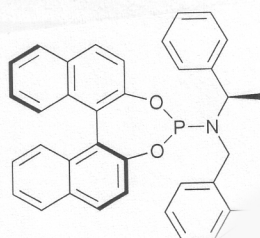

A14

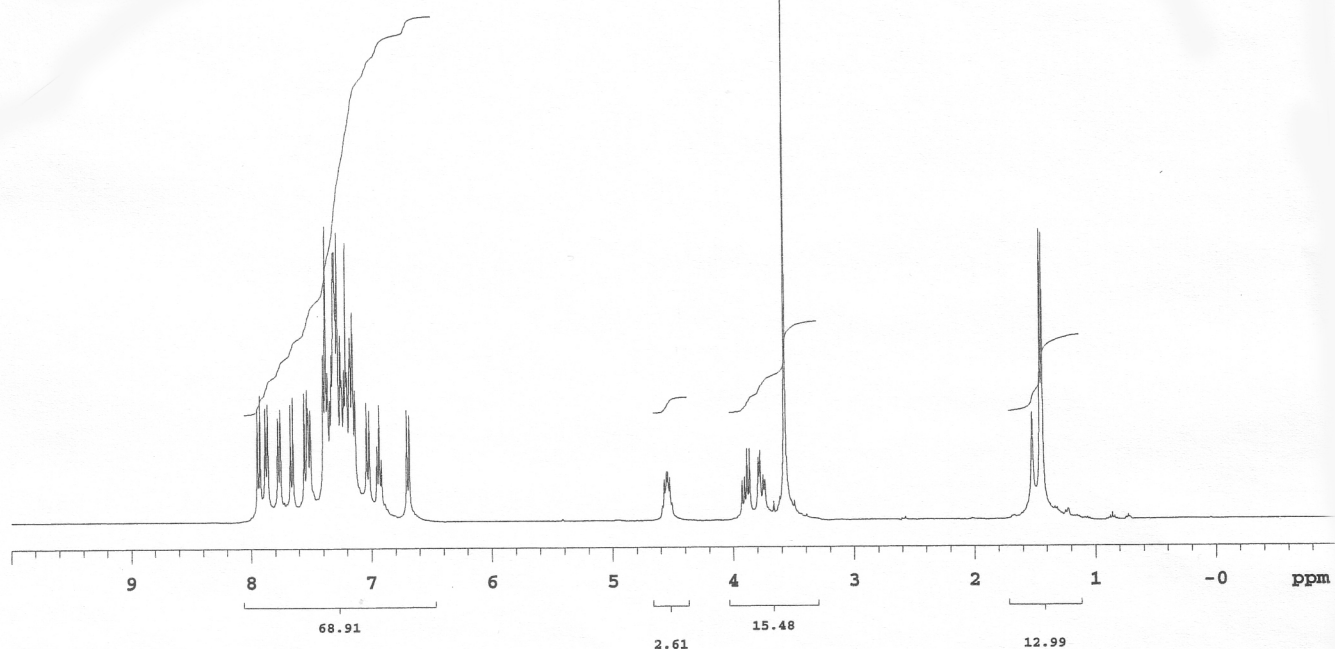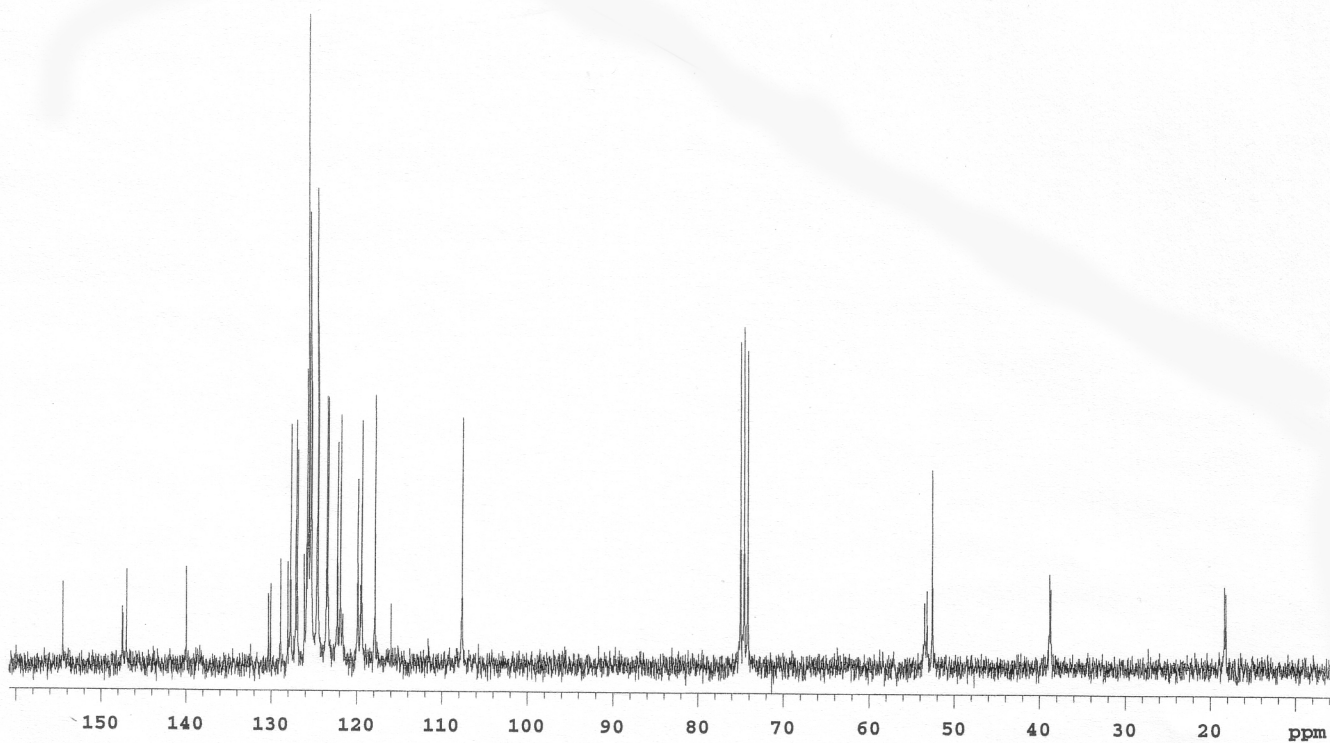

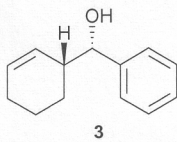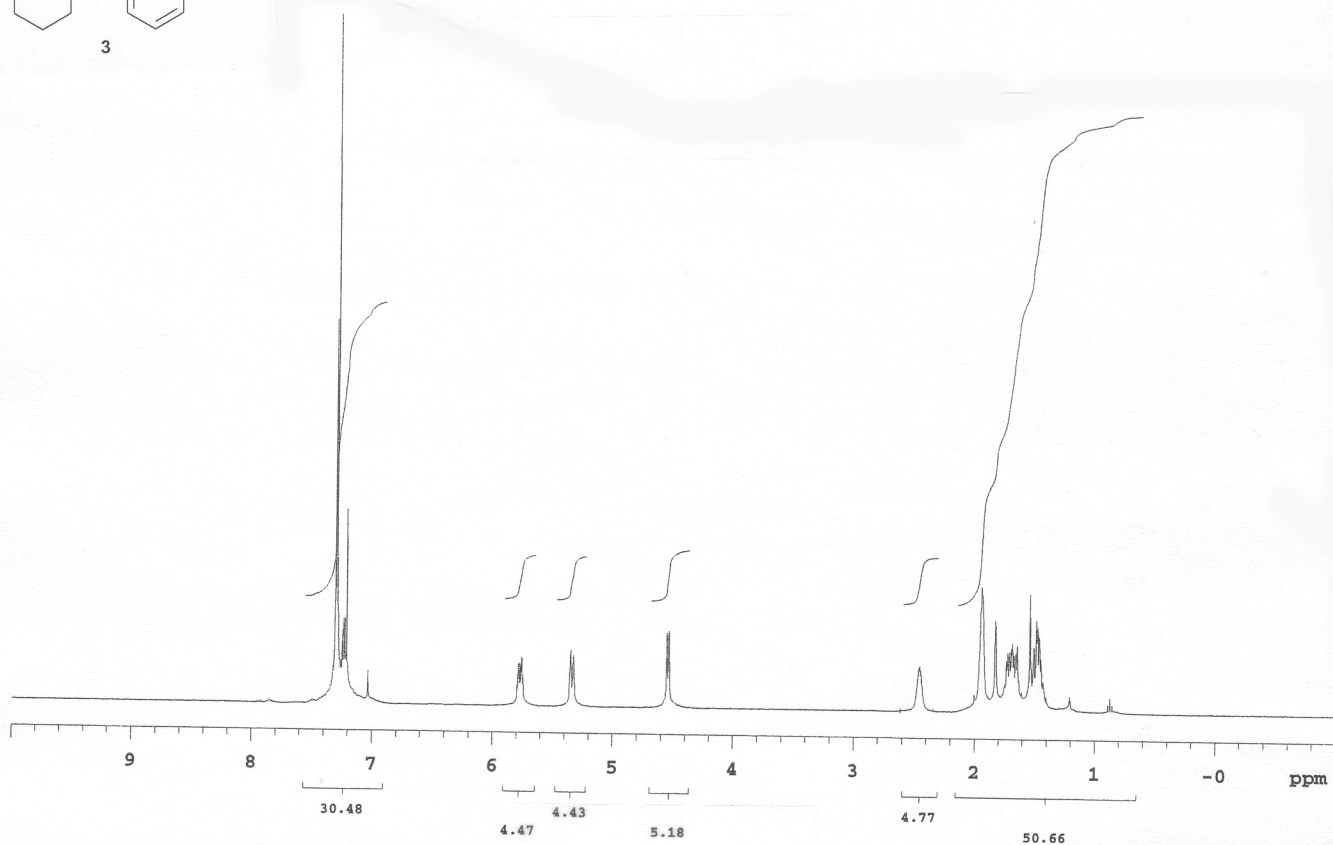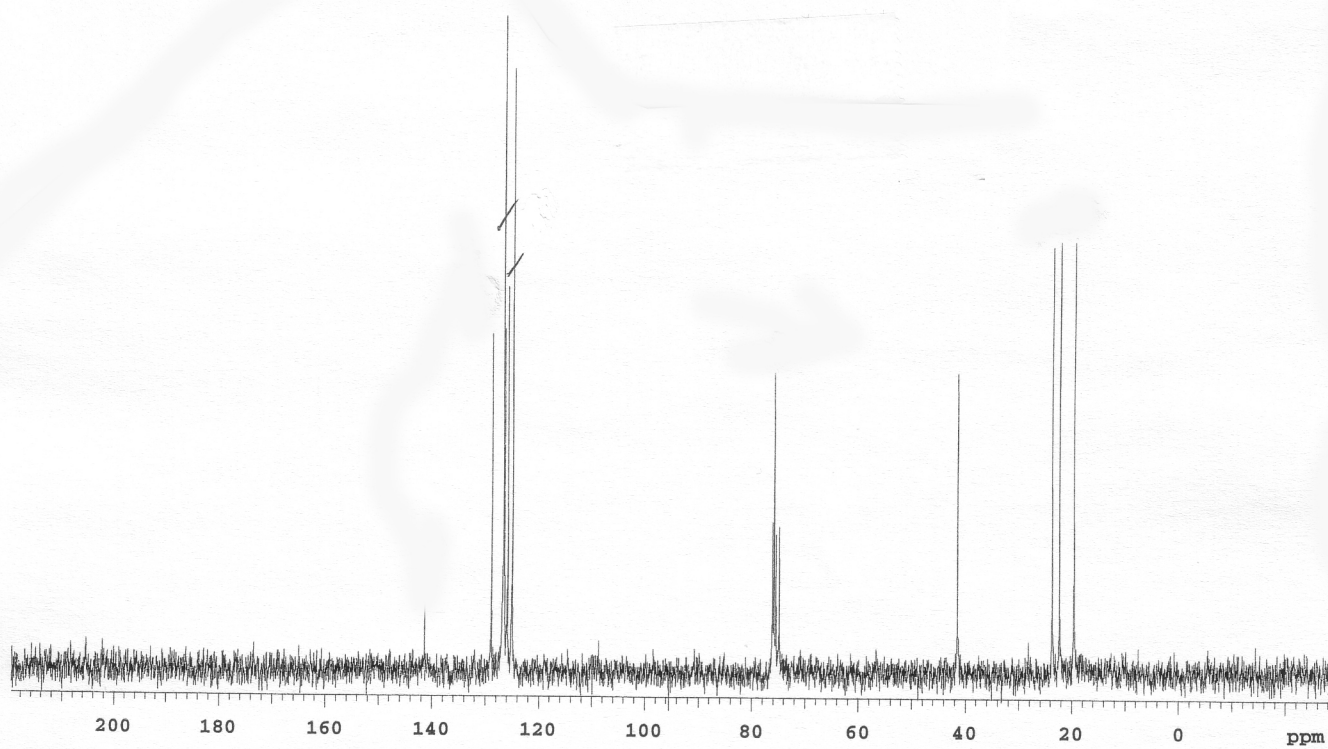

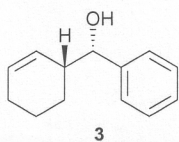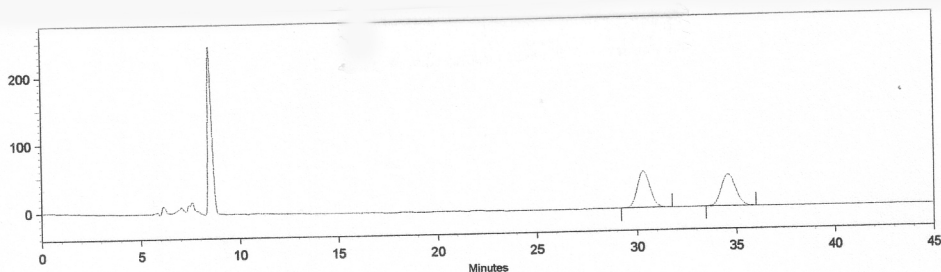

1: 210 nm, 8 nm

| Pk #   | Name | Retention Time | Area    | Area Percent |
|--------|------|----------------|---------|--------------|
| 1      |      | 30.325         | 2395994 | 50.29        |
| 2      |      | 34.592         | 2368739 | 49.71        |
| Totals |      |                | 4764733 | 100.00       |

Peak: enant 1

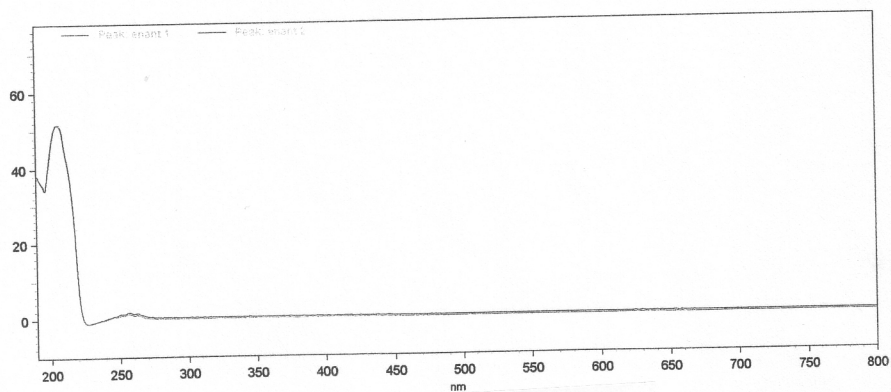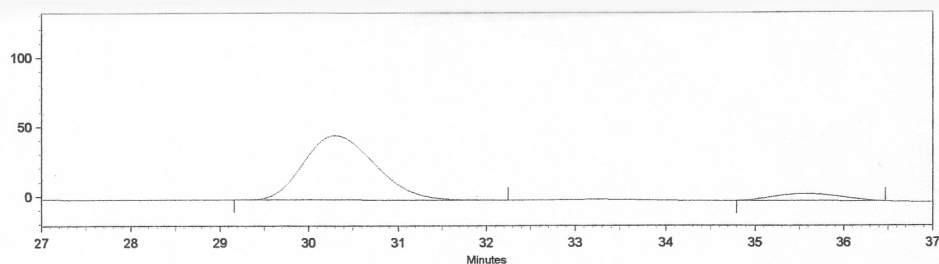

1: 220 nm, 8 nm

| Pk #   | Name | Retention Time | Area    | Area Percent |
|--------|------|----------------|---------|--------------|
| 1      | 1    | 30.304         | 2564472 | 90.58        |
| 2      | 2    | 35.552         | 266817  | 9.42         |
| Totals |      |                | 2831289 | 100.00       |



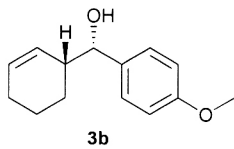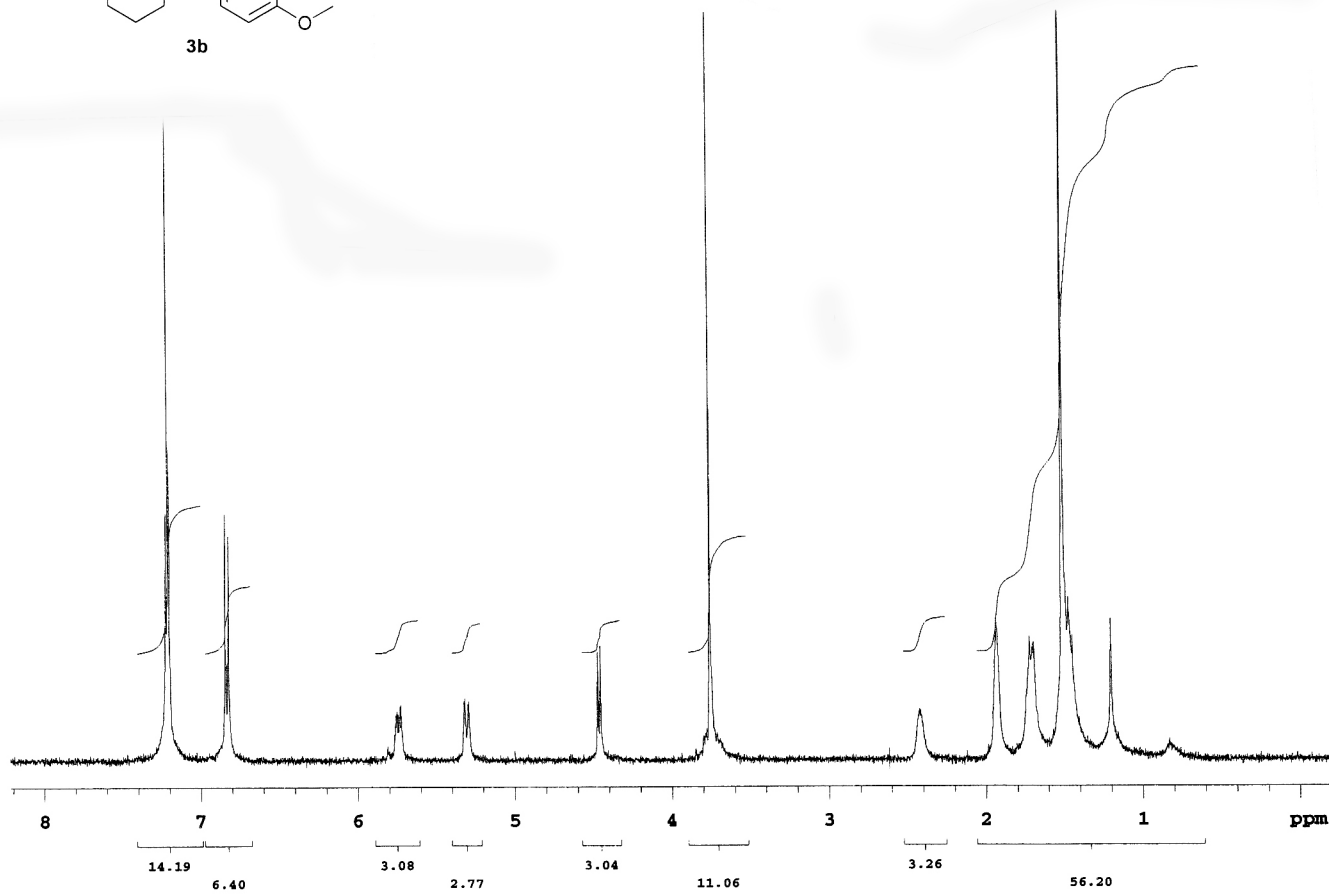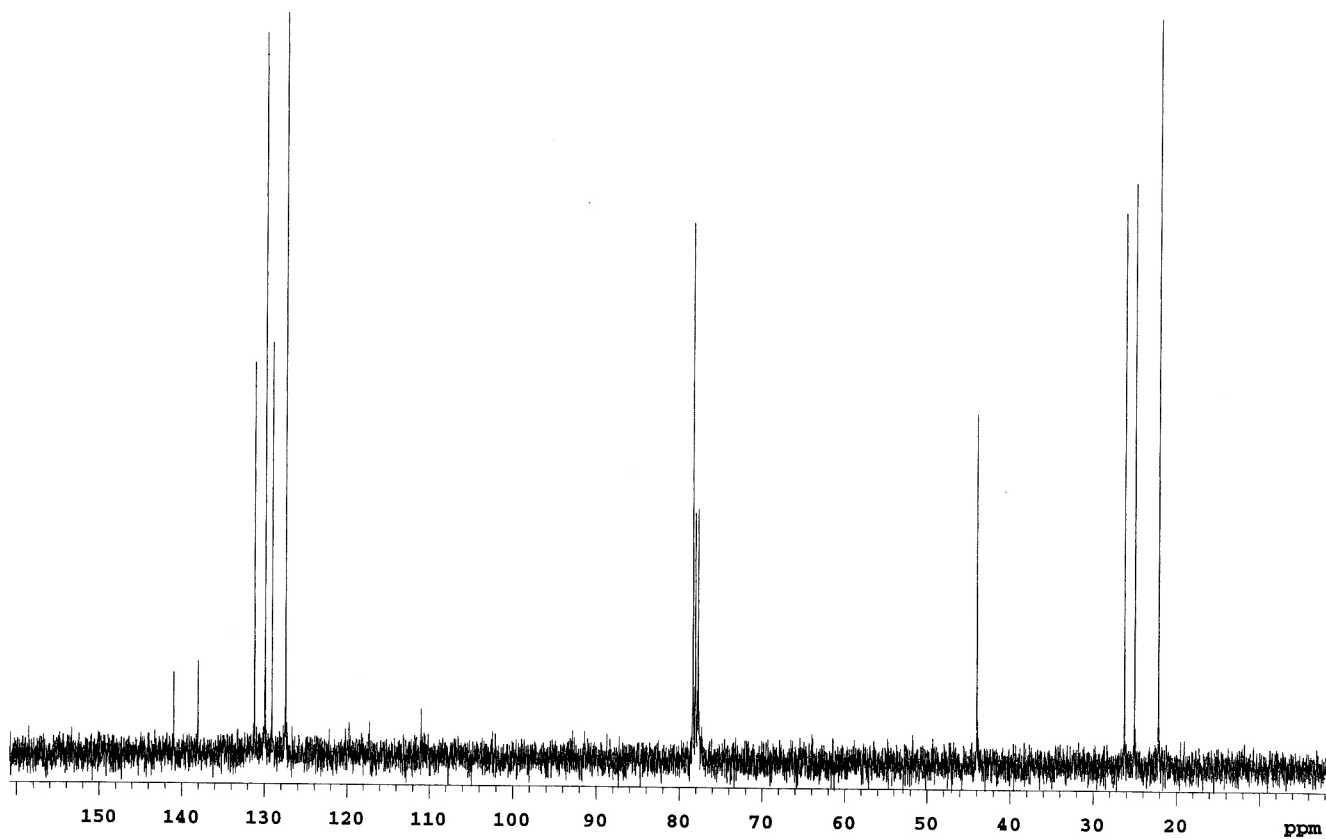

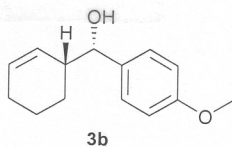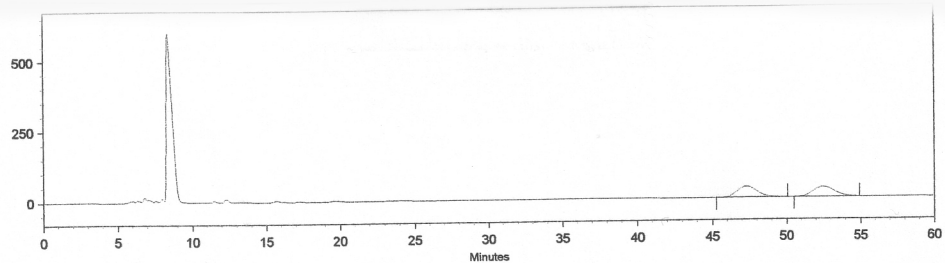

1: 220 nm, 8 nm

| Pk # | Name | Retention Time | Area    | Area Percent |
|------|------|----------------|---------|--------------|
| 1    |      | 47.307         | 3625210 | 49.84        |
| 2    |      | 52.480         | 3648829 | 50.16        |

|        |  |  |         |        |
|--------|--|--|---------|--------|
| Totals |  |  | 7274039 | 100.00 |
|--------|--|--|---------|--------|

Peak 1

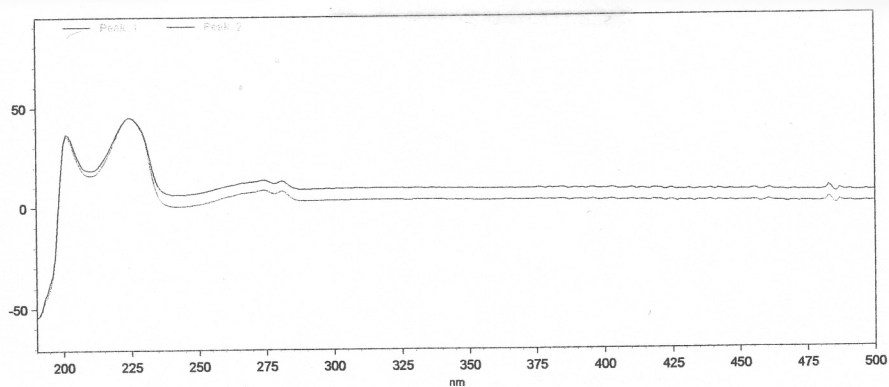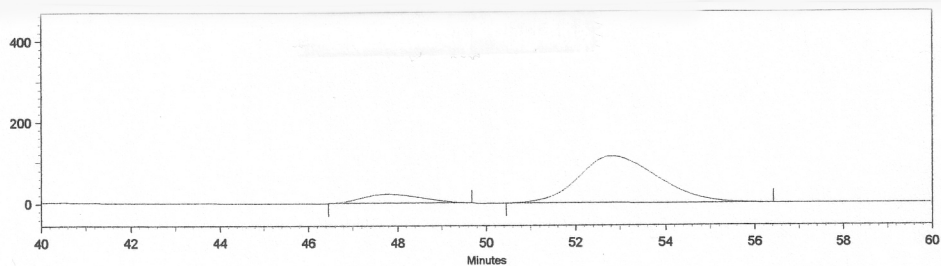

1: 220 nm, 8 nm

| Pk # | Name | Retention Time | Area     | Area Percent |
|------|------|----------------|----------|--------------|
| 1    |      | 47.787         | 2094203  | 13.04        |
| 2    |      | 52.811         | 13965268 | 86.96        |

|        |  |  |          |        |
|--------|--|--|----------|--------|
| Totals |  |  | 16059471 | 100.00 |
|--------|--|--|----------|--------|

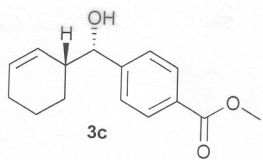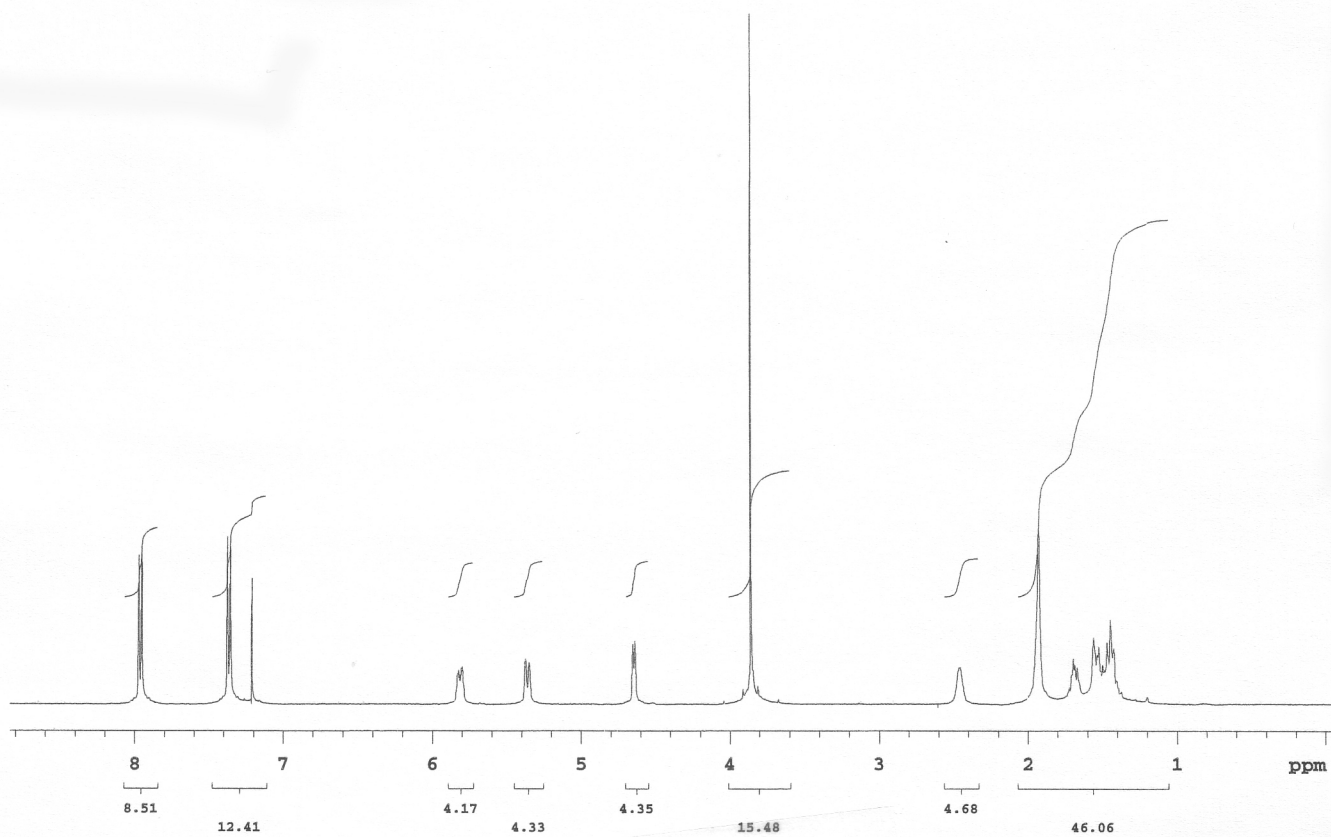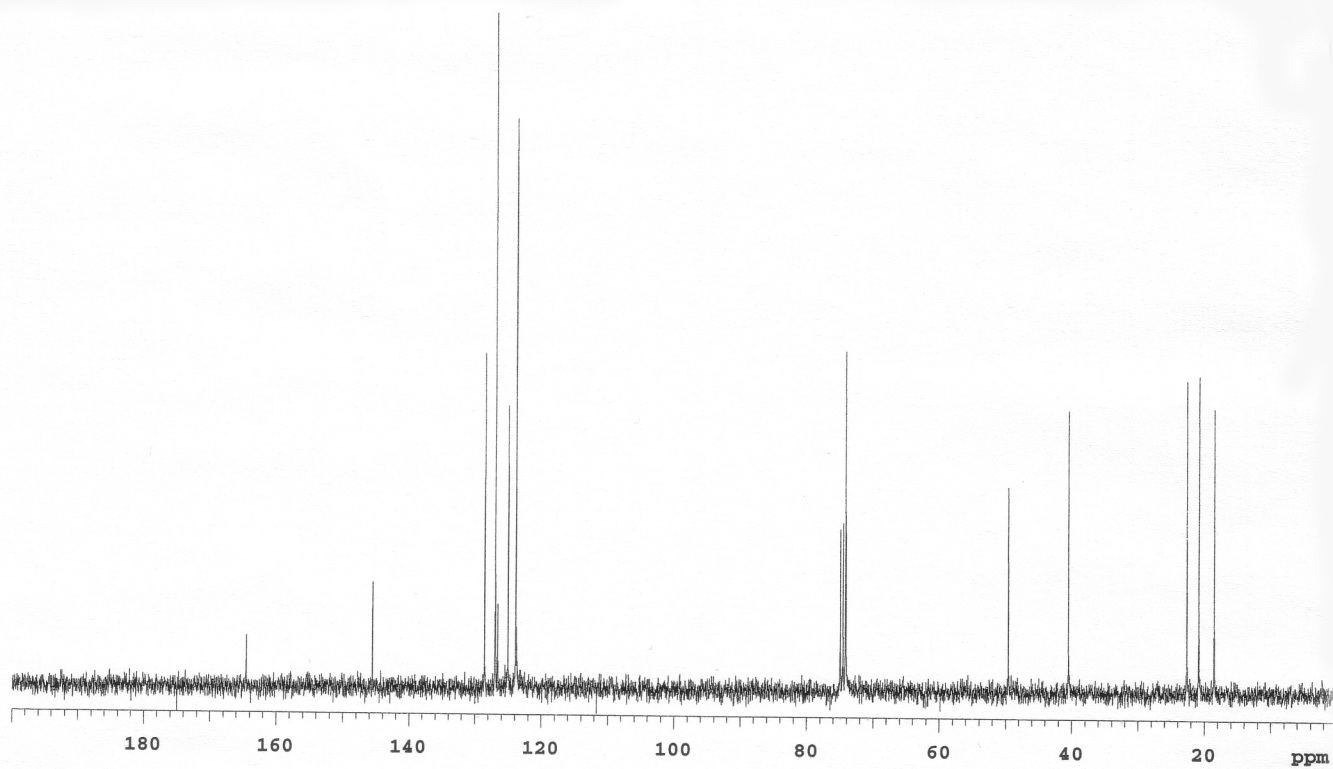

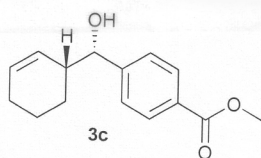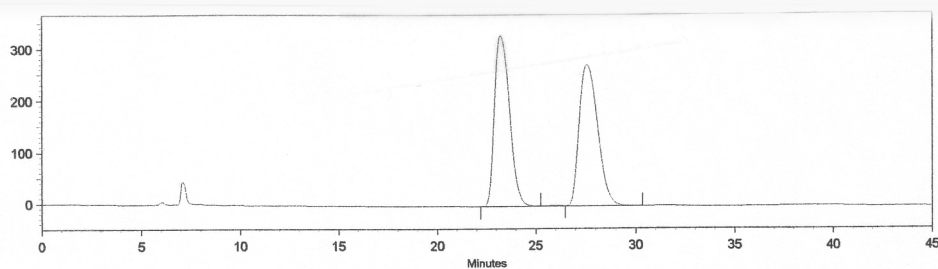

1: 225 nm, 8 nm

| Pk # | Name | Retention Time | Area     | Area Percent |
|------|------|----------------|----------|--------------|
| 1    |      | 23.211         | 17820922 | 49.86        |
| 2    |      | 27.552         | 17919606 | 50.14        |

|        |  |  |          |        |
|--------|--|--|----------|--------|
| Totals |  |  | 35740528 | 100.00 |
|--------|--|--|----------|--------|

Peak: 1

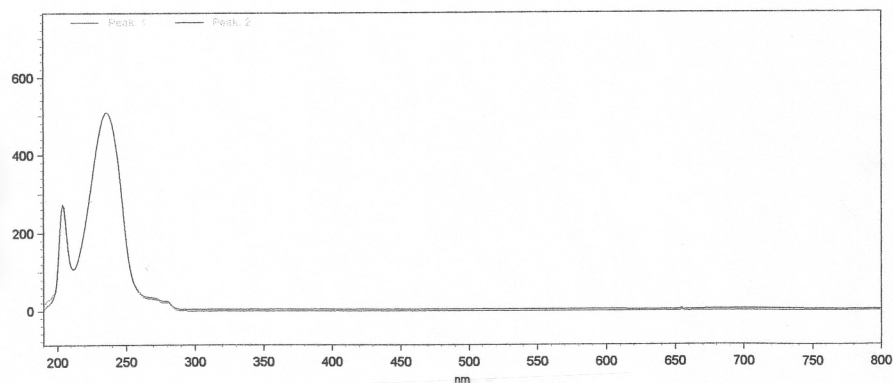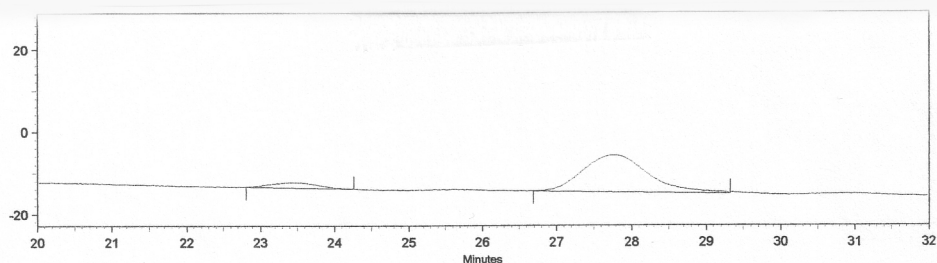

1: 220 nm, 8 nm

| Pk # | Name | Retention Time | Area   | Area Percent |
|------|------|----------------|--------|--------------|
| 1    | 1    | 23.467         | 62243  | 10.23        |
| 2    | 2    | 27.765         | 546185 | 89.77        |

|        |  |  |        |        |
|--------|--|--|--------|--------|
| Totals |  |  | 608428 | 100.00 |
|--------|--|--|--------|--------|

Peak: 1



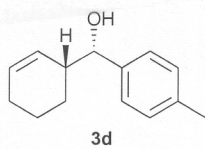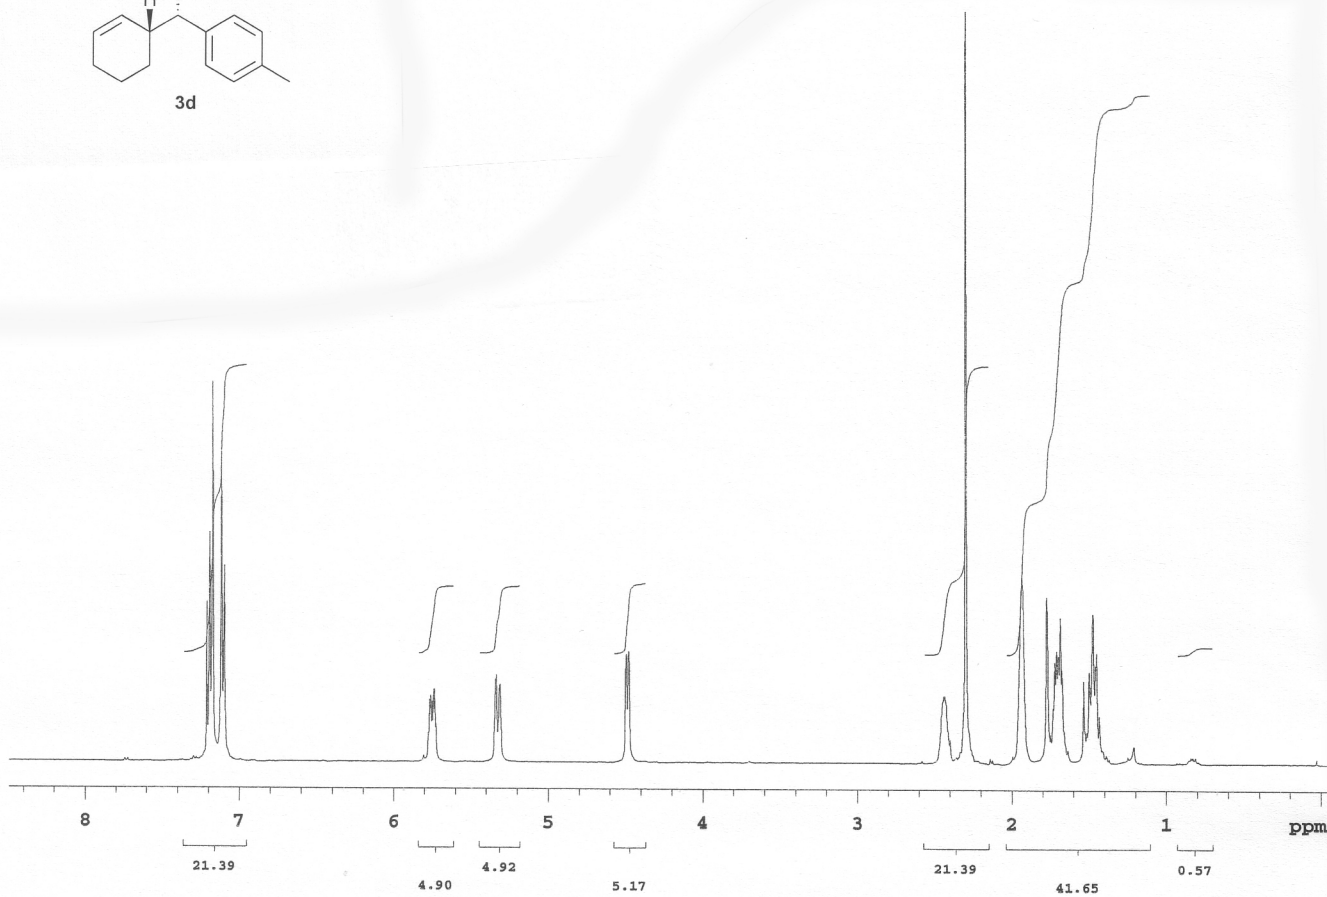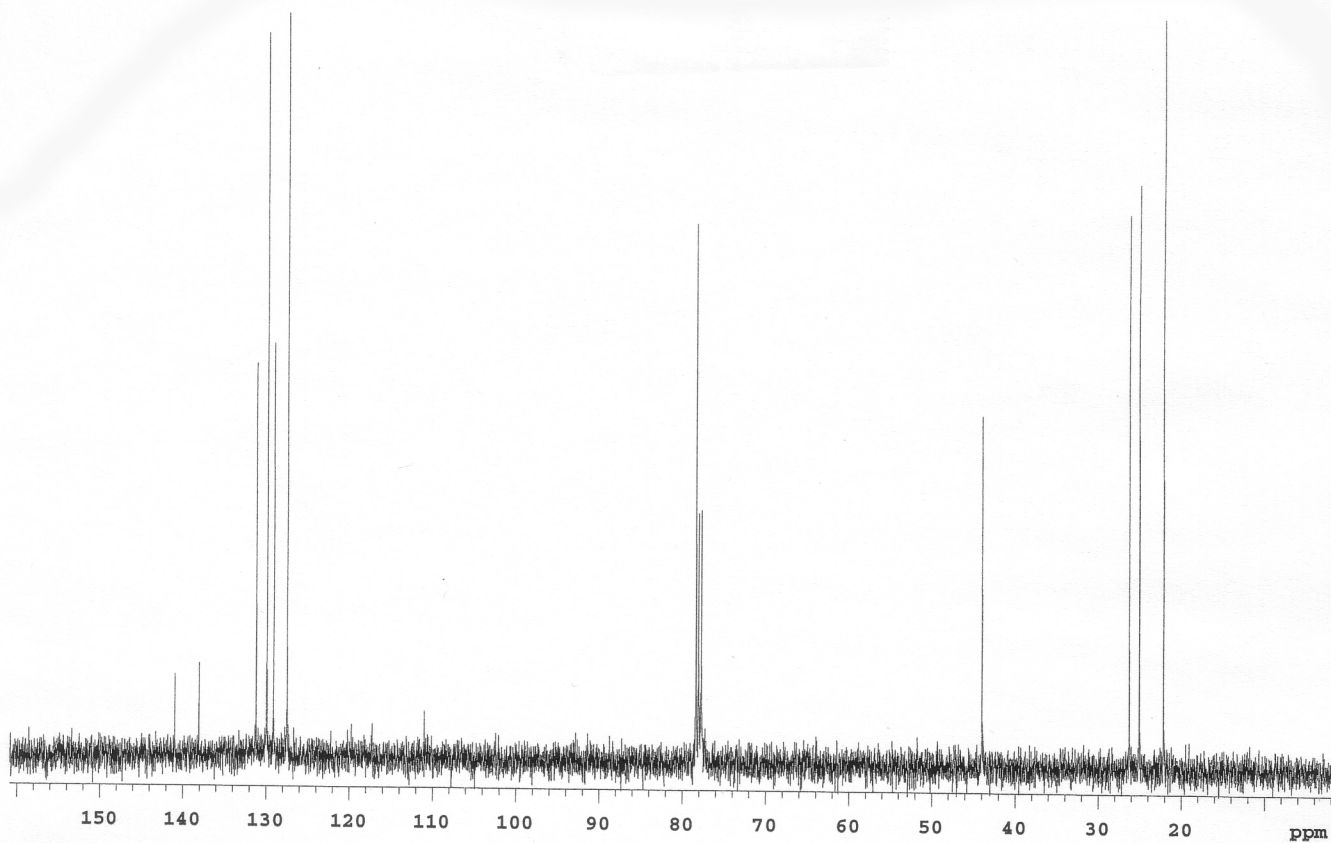

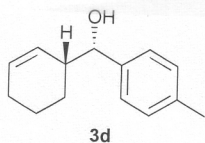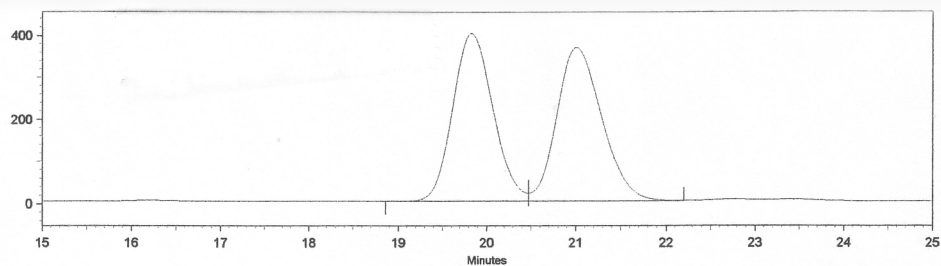

1: 220 nm, 8 nm

| Pk # | Name | Retention Time | Area     | Area Percent |
|------|------|----------------|----------|--------------|
| 1    |      | 19.829         | 12608994 | 49.65        |
| 2    |      | 21.003         | 12784384 | 50.35        |

|        |  |  |          |        |
|--------|--|--|----------|--------|
| Totals |  |  | 25393378 | 100.00 |
|--------|--|--|----------|--------|

Peak: 1

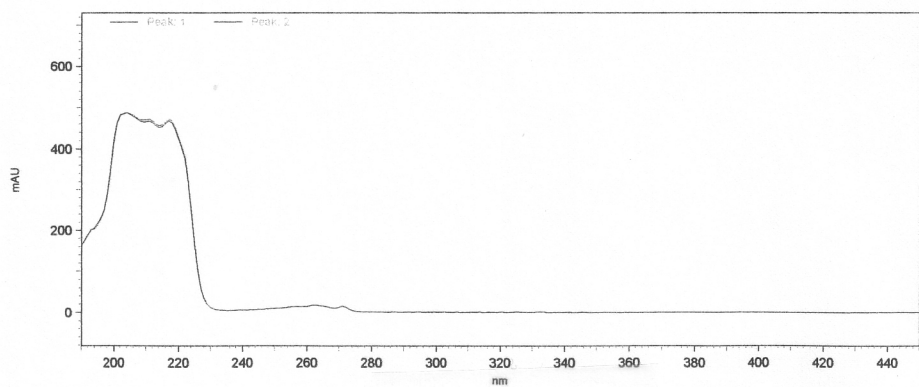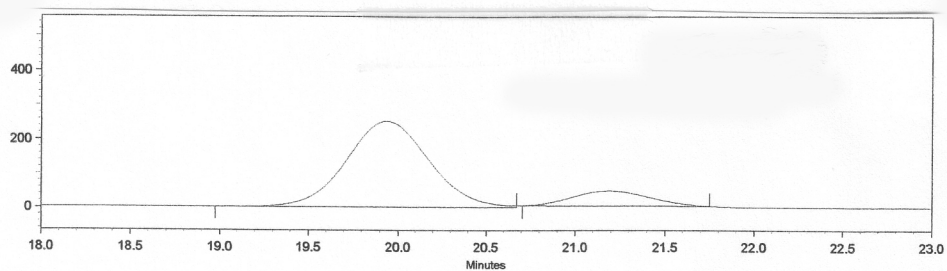

1: 215 nm, 8 nm

| Pk # | Name | Retention Time | Area    | Area Percent |
|------|------|----------------|---------|--------------|
| 1    | 1    | 19.936         | 8216421 | 86.15        |
| 2    | 2    | 21.184         | 1320459 | 13.85        |

|        |  |  |         |        |
|--------|--|--|---------|--------|
| Totals |  |  | 9536880 | 100.00 |
|--------|--|--|---------|--------|

Peak: 1

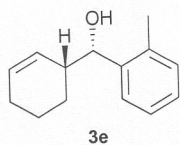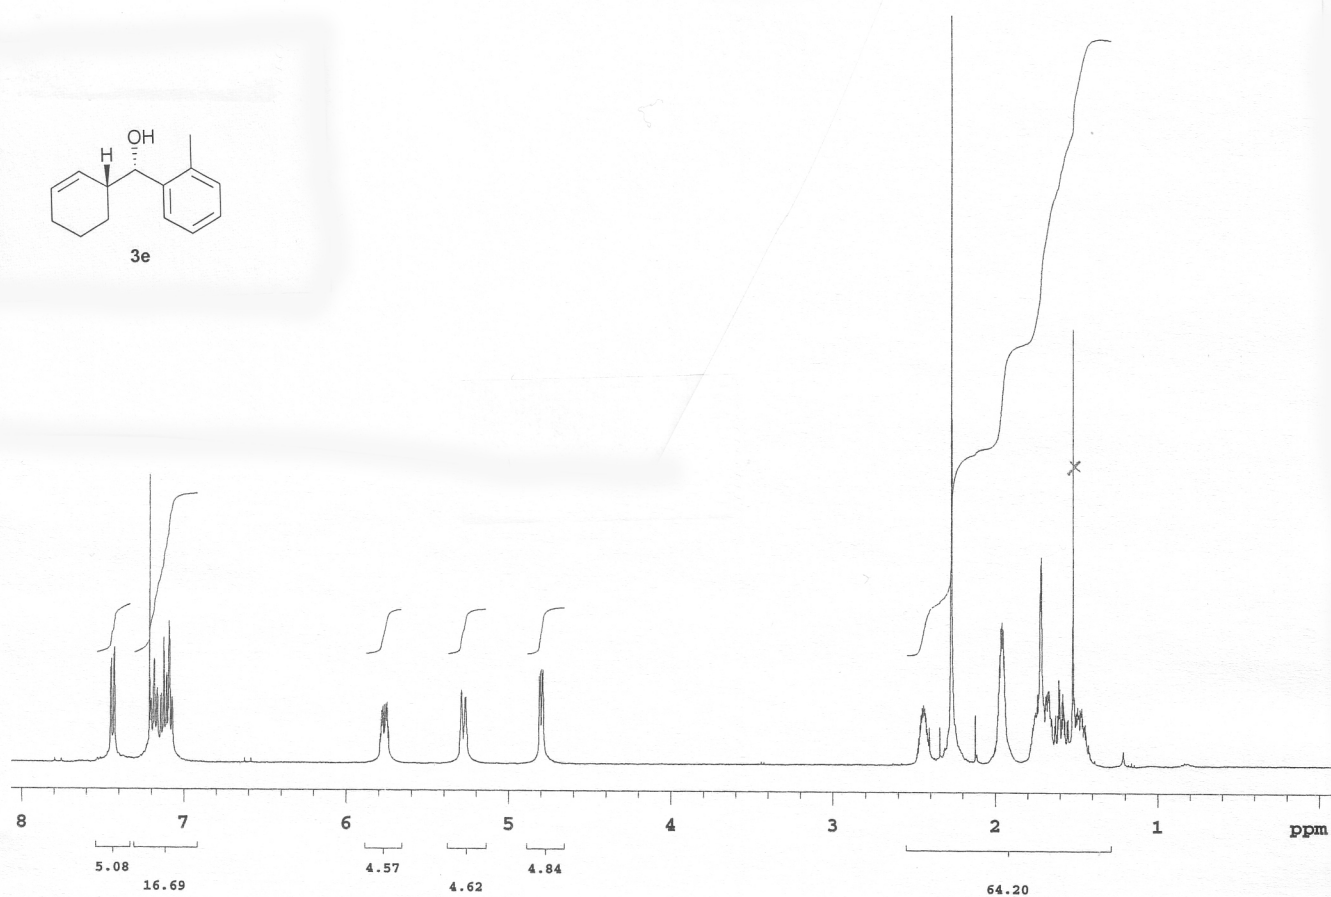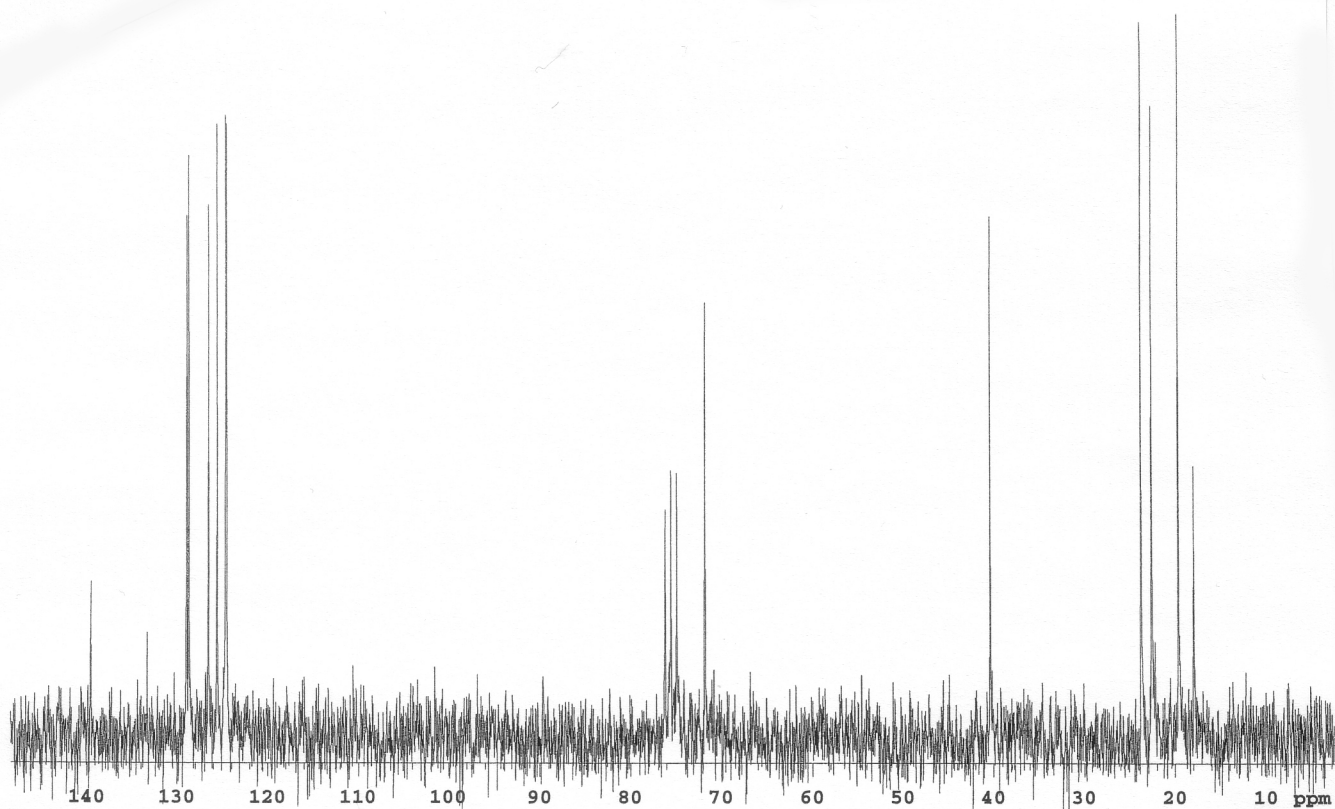



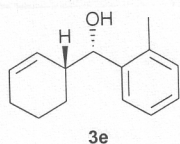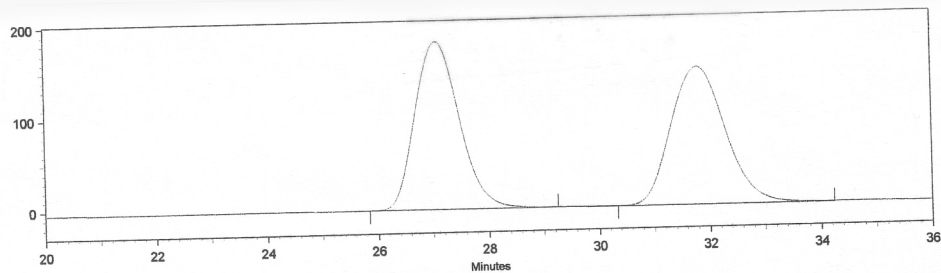

1: 215 nm, 8 nm

| Pk #   | Name | Retention Time | Area     | Area Percent |
|--------|------|----------------|----------|--------------|
| 1      |      | 27.072         | 10325586 | 50.14        |
| 2      |      | 31.797         | 10266781 | 49.86        |
| Totals |      |                | 20592367 | 100.00       |

Peak: 1

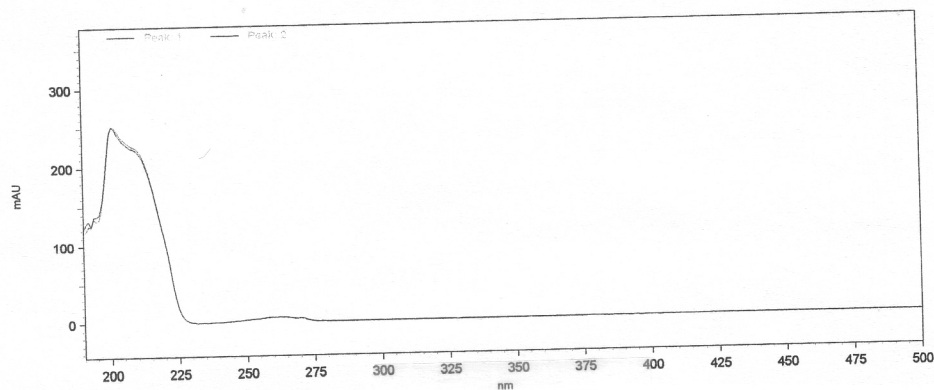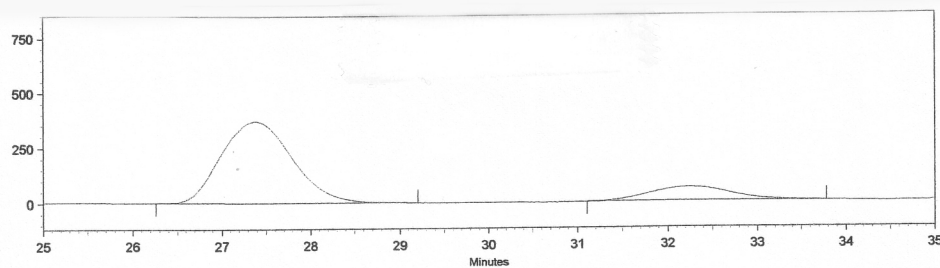

1: 205 nm, 8 nm

| Pk #   | Name | Retention Time | Area     | Area Percent |
|--------|------|----------------|----------|--------------|
| 1      |      | 27.392         | 20606464 | 83.96        |
| 2      |      | 32.256         | 3935670  | 16.04        |
| Totals |      |                | 24542134 | 100.00       |



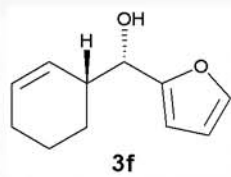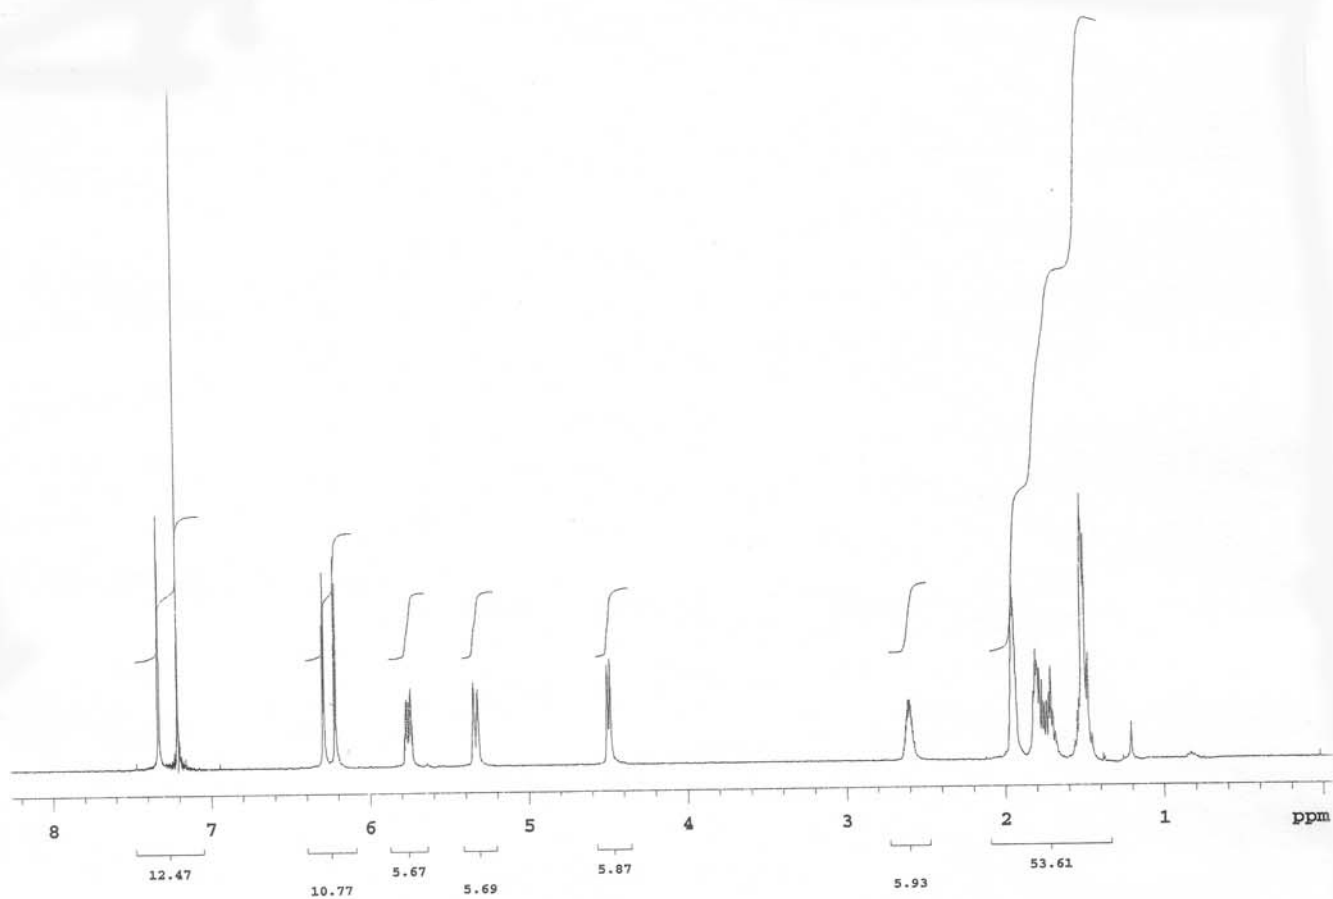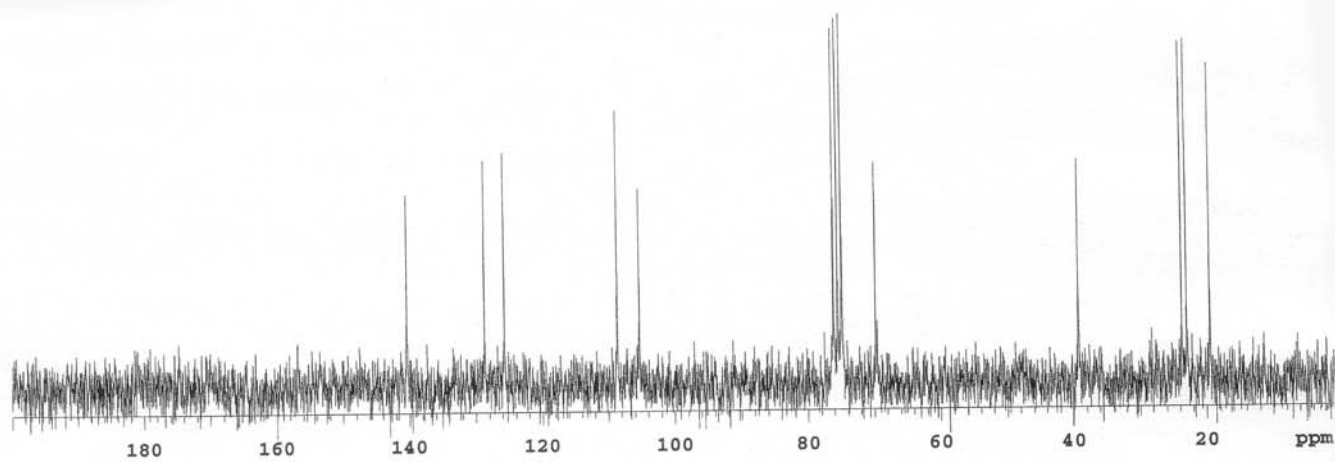

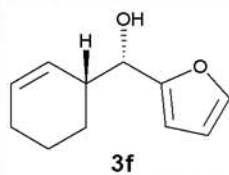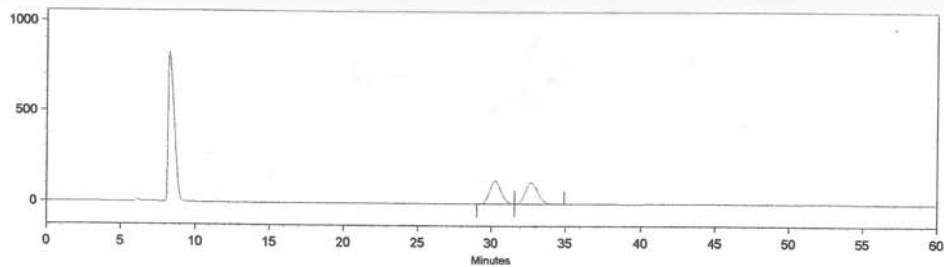

1: 215 nm, 8 nm

| Pk # | Name | Retention Time | Area    | Area Percent |
|------|------|----------------|---------|--------------|
| 1    |      | 30.283         | 7051015 | 49.77        |
| 2    |      | 32.725         | 7116318 | 50.23        |

Peak: 1

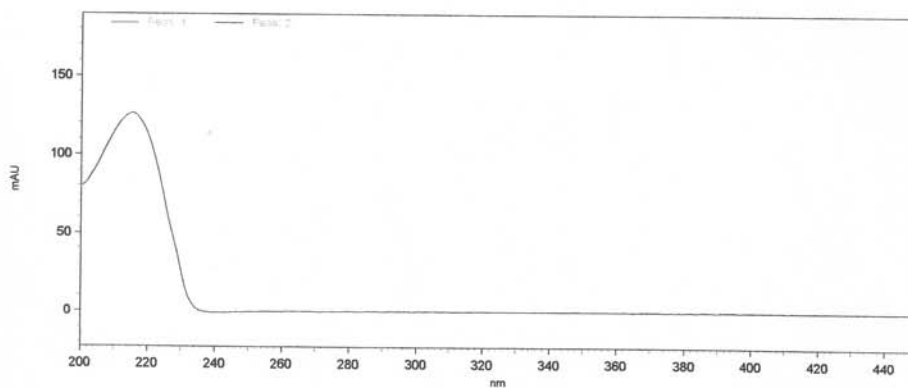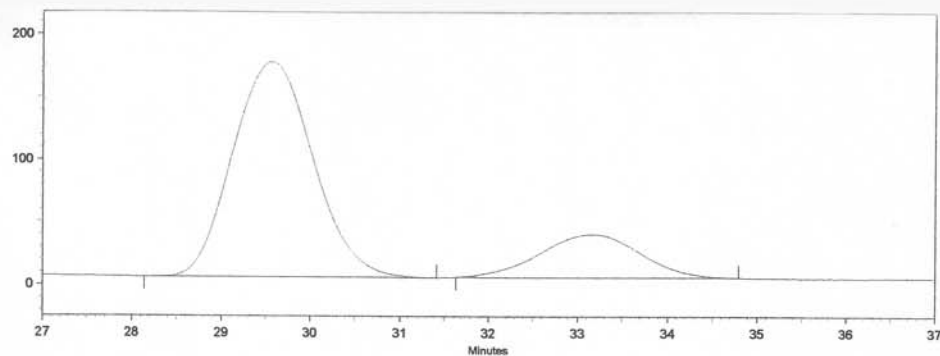

1: 210 nm, 8 nm

| Pk # | Name | Retention Time | Area     | Area Percent |
|------|------|----------------|----------|--------------|
| 1    |      | 29.568         | 10786811 | 80.09        |
| 2    |      | 33.141         | 2681765  | 19.91        |

|        |  |  |          |        |
|--------|--|--|----------|--------|
| Totals |  |  | 13468576 | 100.00 |
|--------|--|--|----------|--------|

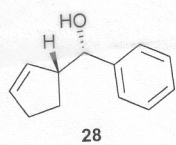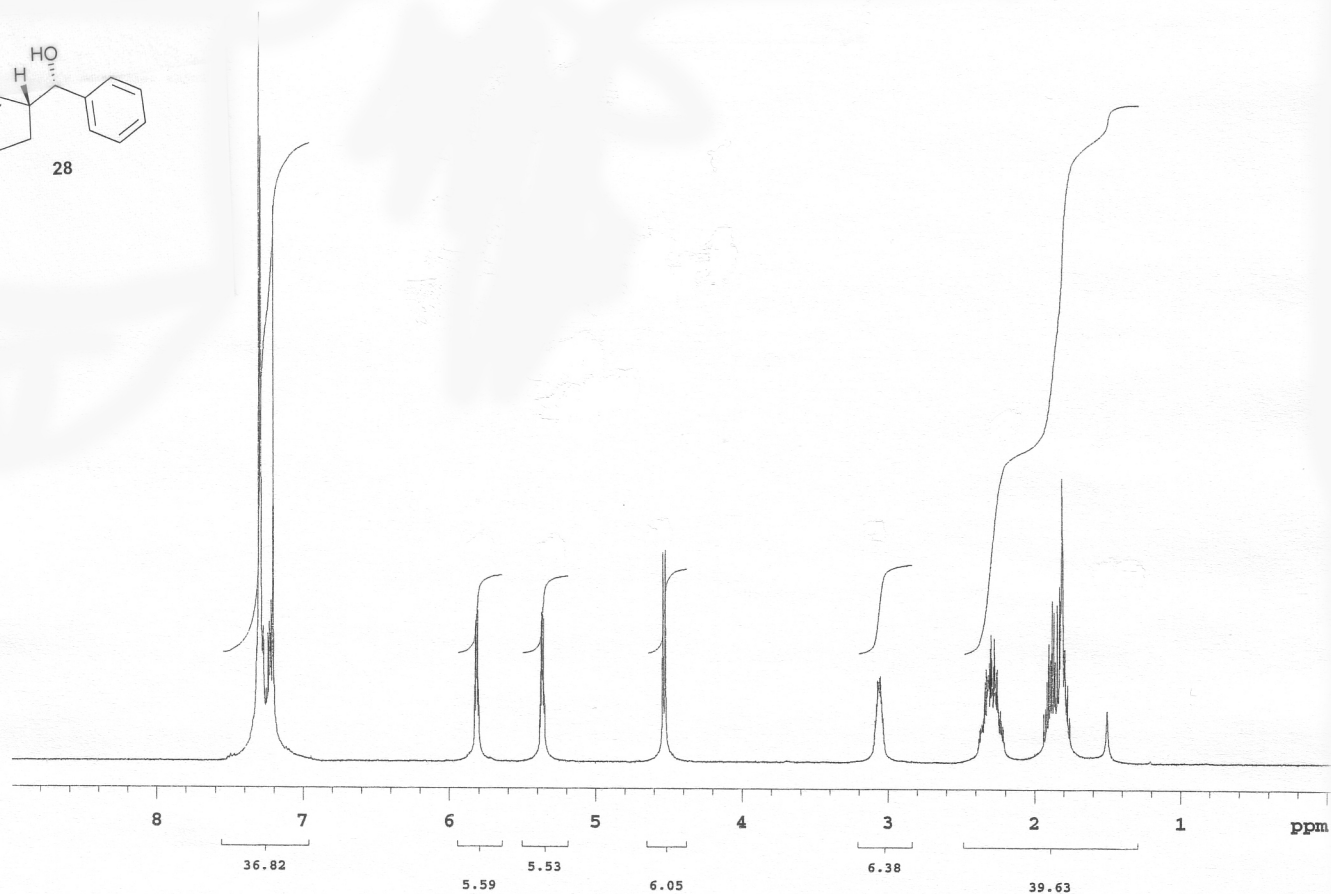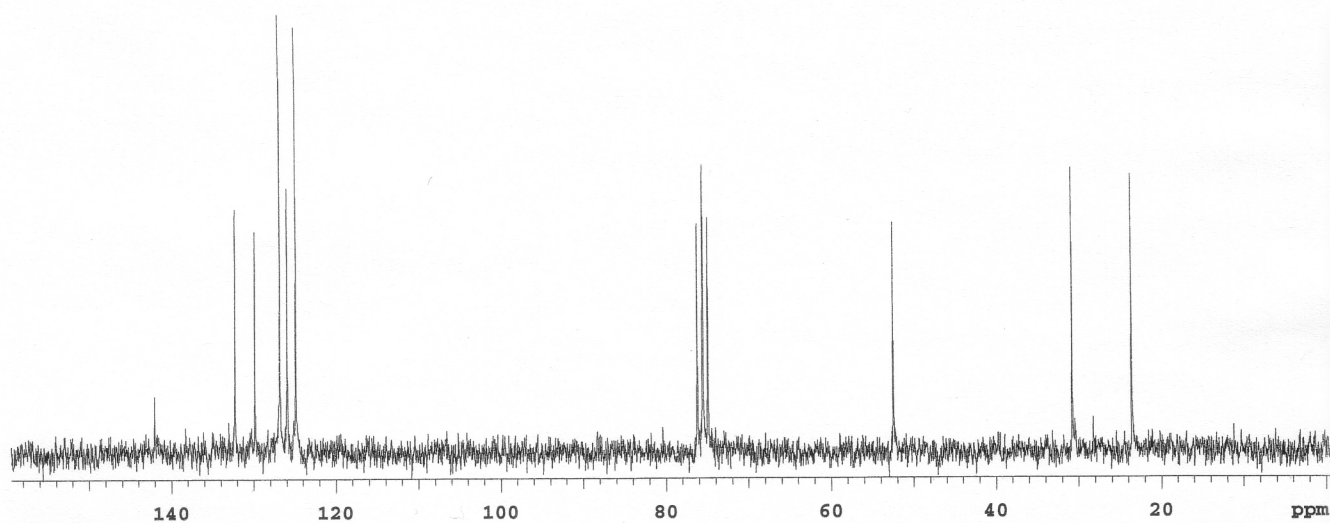

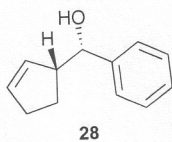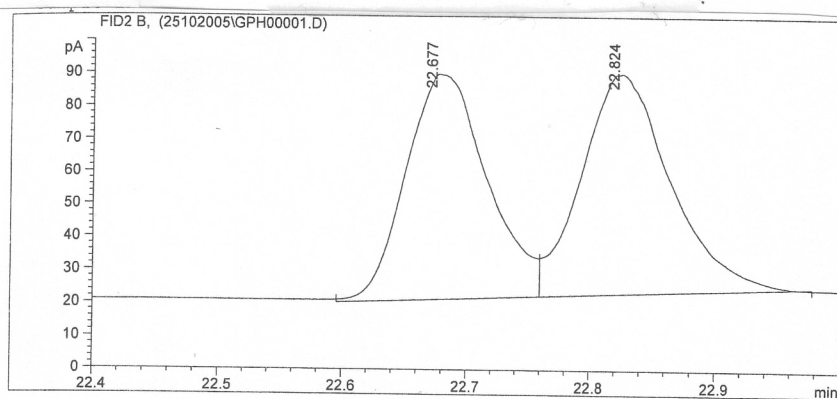

Signal 1: FID2 B,

| Peak # | RT [min] | Type | Name | Width [min] | Area    | Area % | Response | Amount |
|--------|----------|------|------|-------------|---------|--------|----------|--------|
| 1      | 22.677   | MV   |      | 0.075       | 311.160 | 48.336 | 0.000    | 0.000  |
| 2      | 22.824   | VM   |      | 0.083       | 332.580 | 51.664 | 0.000    | 0.000  |

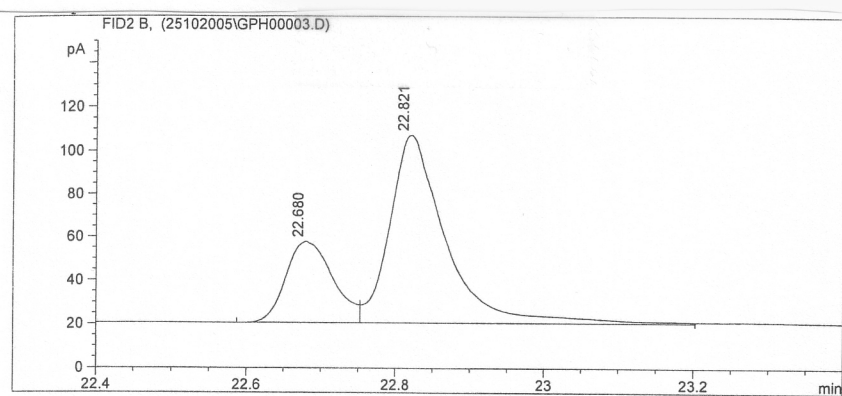

Signal 1: FID2 B,

| Peak # | RT [min] | Type | Name | Width [min] | Area    | Area % | Response | Amount |
|--------|----------|------|------|-------------|---------|--------|----------|--------|
| 1      | 22.680   | MF   |      | 0.073       | 161.725 | 26.320 | 0.000    | 0.000  |
| 2      | 22.821   | FM   |      | 0.087       | 452.725 | 73.680 | 0.000    | 0.000  |



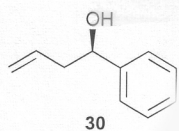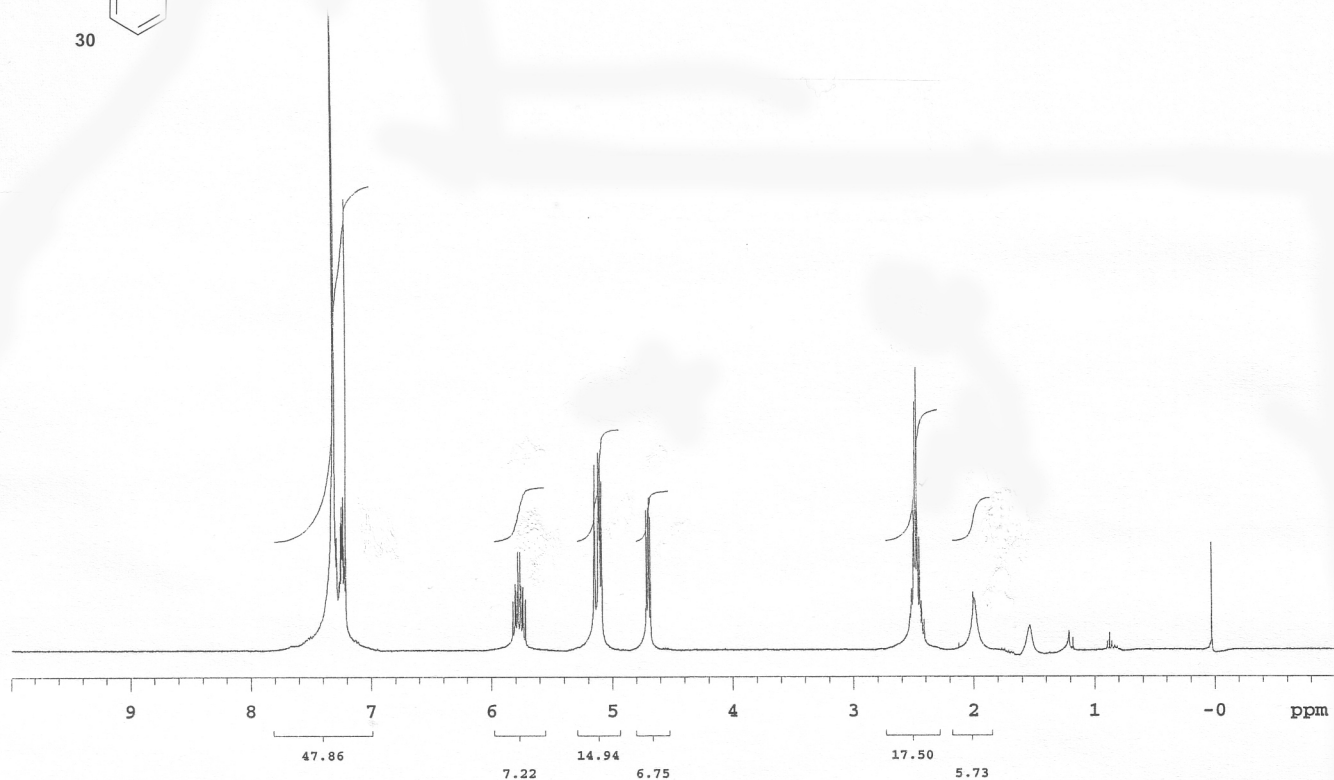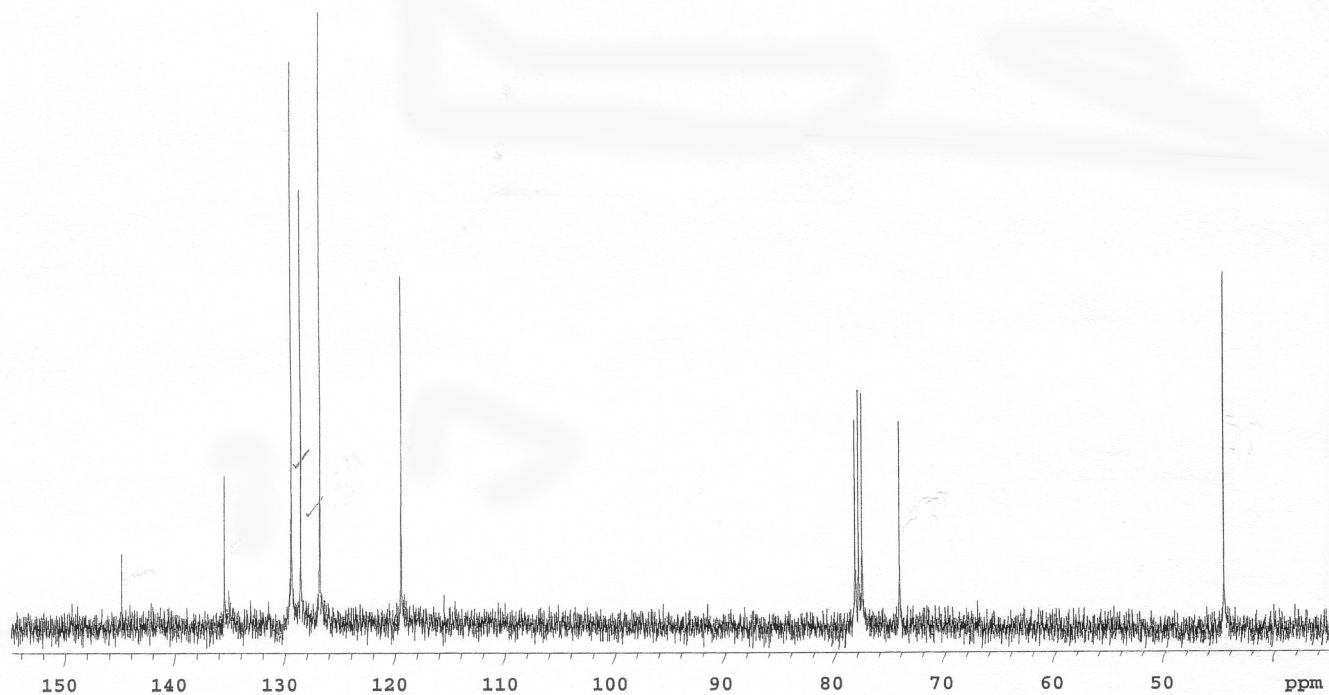

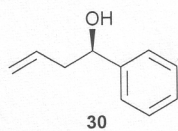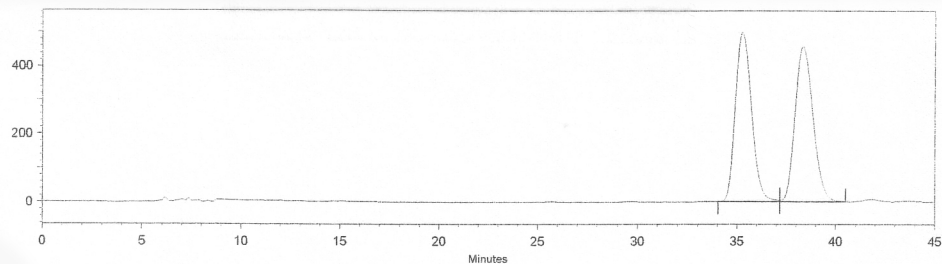

1: 210 nm, 8 nm

| Pk # | Name | Retention Time | Area     | Area Percent |
|------|------|----------------|----------|--------------|
| 1    |      | 35.243         | 28757286 | 49.75        |
| 2    |      | 38.315         | 29046222 | 50.25        |

|        |  |  |          |        |
|--------|--|--|----------|--------|
| Totals |  |  | 57803508 | 100.00 |
|--------|--|--|----------|--------|

Peak: 1

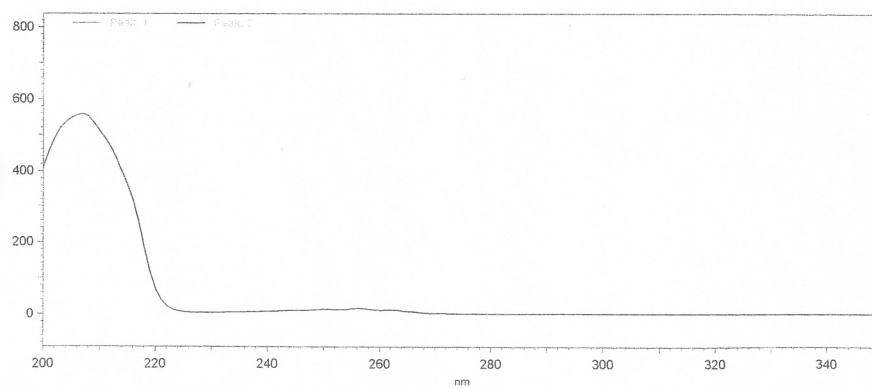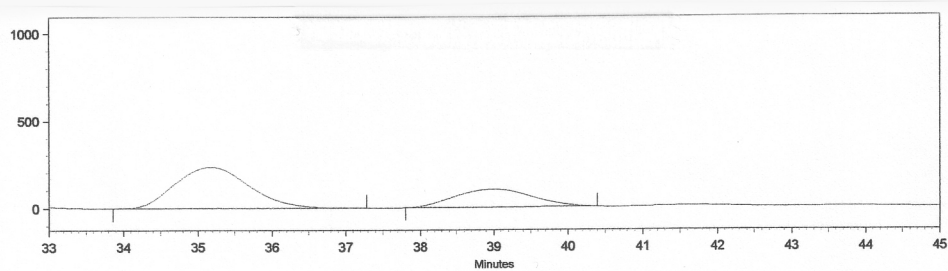

1: 215 nm, 8 nm

| Pk # | Name | Retention Time | Area     | Area Percent |
|------|------|----------------|----------|--------------|
| 1    |      | 35.179         | 16308299 | 68.54        |
| 2    |      | 38.997         | 7484589  | 31.46        |

|        |  |  |          |        |
|--------|--|--|----------|--------|
| Totals |  |  | 23792888 | 100.00 |
|--------|--|--|----------|--------|
